1 **A Non-conventional Archaeal Fluorinase Identified by *In Silico* Mining Catalyzes the**  
2 **Fastest Natural Nucleophilic Fluorination**

3  
4 Isabel Pardo<sup>1†</sup>, David Bednar<sup>2,3</sup>, Patricia Calero<sup>1</sup>, Daniel C. Volke<sup>1</sup>, Jiří Damborský<sup>2,3</sup> & Pablo I. Nikel<sup>1\*</sup>

5  
6 <sup>1</sup> The Novo Nordisk Foundation Center for Biosustainability, Technical University of Denmark, Kgs. Lyngby,  
7 Denmark; <sup>2</sup> Loschmidt Laboratories, Department of Experimental Biology and RECETOX, Faculty of Science,  
8 Masaryk University, Brno, Czech Republic & <sup>3</sup> International Clinical Research Centre, St. Anne's University  
9 Hospital, Brno, Czech Republic.

10  
11 **KEYWORDS:** fluorinase, genome mining, fluorine, synthetic biology, biocatalysis, metabolic engineering

12  
13 *Corresponding author*

14 \* E-mail: [pabnik@biosustain.dtu.dk](mailto:pabnik@biosustain.dtu.dk)

15  
16 *Present Address*

17 † Department of Microbial and Plant Biotechnology, Centro de Investigaciones Biológicas Margarita Salas,  
18 CSIC, Madrid, Spain

1 **ABSTRACT**

2

3 Fluorinases, the only enzymes known to catalyze the transfer of fluorine to an organic molecule, are essential  
4 biocatalysts for the sustainable synthesis of valuable organofluorines. However, the few fluorinases identified  
5 so far have low turnover rates that hamper biotechnological applications. Here, we isolated and characterized  
6 putative fluorinases retrieved from systematic *in silico* mining and identified a non-conventional archaeal  
7 enzyme from *Methanosaeta* sp. that mediates the highest fluorination rate reported to date. Furthermore, we  
8 demonstrate enhanced production of fluoronucleotides *in vivo* in a bacterial host engineered with this  
9 archaeal fluorinase, paving the way towards synthetic metabolism for efficient biohalogenations.

10

11

Fastest biological S<sub>N</sub>2 fluorination

## 1 INTRODUCTION

2  
3 Fluorinated organic compounds (organofluorines), containing at least one fluorine (F) atom, are chemicals of  
4 enormous industrial interest—as evidenced by their increasing prevalence in newly developed  
5 pharmaceuticals and agrochemicals (Harsanyi and Sandford, 2015; Inoue *et al.*, 2020; Ogawa *et al.*, 2020).  
6 The unique physicochemical properties of F endow organofluorines with advantageous properties with  
7 respect to their non-fluorinated counterparts, e.g. increased chemical stability or improved bioavailability  
8 (O'Hagan, 2008). However, the abundance of human-made organofluorines contrasts with their relative  
9 scarcity in Nature (Carvalho and Oliveira, 2017). 5'-Fluoro-5'-deoxyadenosine (5'-FDA) synthase, or  
10 fluorinase (FIA), is the only one enzyme known to naturally catalyze the formation of the high-energy C–F  
11 bond. This enzyme, originally identified in *Streptomyces cattleya* (O'Hagan *et al.*, 2002; Schaffrath *et al.*,  
12 2003; Dong *et al.*, 2004), catalyzes the S<sub>N</sub>2 transfer of a fluoride ion (F<sup>-</sup>) to the C5' of the essential methyl  
13 donor S-adenosyl-L-methionine (SAM). As indicated in step I of **Fig. 1**, this reaction generates 5'-FDA and L-  
14 methionine (L-Met) as products (Zhu *et al.*, 2007). Since the discovery of FIA in 2003, only six other  
15 fluorinases have been reported in the literature, all of them sourced from Actinomycetes (Deng *et al.*, 2014;  
16 Ma *et al.*, 2016; Sooklal *et al.*, 2020). Additionally, a chlorinase closely related to FIAs, catalyzing 5'-chloro-  
17 5'-deoxyadenosine (5'-CIDA) synthesis (step II in **Fig. 1**), has also been identified in the marine Actinomycete  
18 *Salinispora tropica* (Eustáquio *et al.*, 2008). FIA from *S. cattleya* is capable of catalyzing the chlorination  
19 reaction as well, albeit much less efficiently than fluorination (Deng *et al.*, 2006). Conversely, the SalL  
20 chlorinase cannot catalyze the formation of C–F bonds. This activity difference has been attributed to a 23-  
21 residue loop, present in all known FIAs but absent in SalL. It was hypothesized that this loop, located near  
22 the catalytic site, could influence halide specificity by modifying the architecture of the binding pocket.

23  
24 Considering the environmentally-harsh conditions currently required for the chemical synthesis of  
25 organofluorines (Cros *et al.*, 2022), FIAs are promising biocatalysts for “green” production of new-to-Nature,  
26 bio-derived organofluorines and the implementation of synthetic metabolism with fluorinated intermediates in  
27 living cells (Martinelli and Nickel, 2019; Nieto-Domínguez and Nickel, 2020). However, all known FIAs are poor  
28 biocatalysts, with turnover rates < 1 min<sup>-1</sup>. So far, the handful of protein engineering efforts aimed at the  
29 improvement of FIA activity have had limited success (Thomsen *et al.*, 2013; Sun *et al.*, 2016). Furthermore,

1 these studies mostly relied on employing surrogate substrates, e.g. 5'-CIDA, to select for enzyme variants  
2 with improved transhalogenation activity (steps III and I in **Fig. 1**). This strategy hampers the wide applicability  
3 of FIAs in a consolidated, whole-cell bioprocess where only F<sup>-</sup> and an appropriate carbon substrate would  
4 be supplied as feed-stock (Calero *et al.*, 2020; Markakis *et al.*, 2020).

5  
6 Genome-wide databases are a rich source of potentially valuable enzymes, yet their continuous, exponential  
7 expansion makes the selection of catalytically-attractive candidates challenging. The EnzymeMiner platform  
8 has been recently developed to address this issue (Hon *et al.*, 2020), as an inter-active and user-friendly  
9 website (<https://loschmidt.chemi.muni.cz/enzymeminer>). This bioinformatic tool searches through databases  
10 upon submitting a sequence of at least one representative member of the target enzyme family, together with  
11 the identification of essential (i.e. catalytic) residues. EnzymeMiner conducts multiple database searches and  
12 accompanying calculations, which provide a set of hits and their systematic annotation based on protein  
13 solubility, possible extremophilicity, domain structures and other structural information. These collected and  
14 calculated annotations provide users with key information needed for the selection of the most promising  
15 sequences for gene synthesis, small-scale protein expression, purification, and functional characterization  
16 (Vanacek *et al.*, 2018).

17  
18 With the goal of expanding the FIA toolset for the biological production of organofluorines, here we describe  
19 the systematic screening and *in vitro* characterization of hitherto unknown FIAs retrieved from genome  
20 databases using EnzymeMiner. This approach led to the isolation of a non-conventional fluorinase enzyme  
21 (identified as a chlorinase) that catalyzes the fastest S<sub>N</sub>2 fluorination reaction reported thus far. Likewise, the  
22 implementation of this enzyme in engineered bacterial cell factories gave rise to the highest fluorometabolite  
23 content produced *via de novo* biofluorination.

## RESULTS & DISCUSSION

In an effort to identify “Nature’s best” biocatalyst, the fluorinase from *Streptomyces* sp. MA37 (FIAMA37) was used as the query sequence (Uni-Prot W0W999), and the residues D16, Y77, S158, D210, and N215 were specified as essential based on their implication in catalysis and substrate binding (**Fig. 2a**). After curing redundant sequences, sixteen unique candidates were obtained (**Table 1** and **Fig. 2b**). Some of the retrieved amino acid sequences were found to be missing several *N*-terminal residues, which were added after manually curating the deposited genome sequences from which the fluorinase genes had been predicted (**Table S1**). Out of the sixteen sequences retrieved, five corresponded to fluorinases previously reported in the literature (thus serving as an internal quality control of the prediction routine), while nine corresponded to new putative fluorinases. Another two sequences corresponded to the chlorinase from *Salinispora tropica* CNB-440 (Sall) and a putative chlorinase from the archaea *Methanosaeta* sp. PtaU1.Bin055 (FIAPtaU1). Both of these sequences lack the 23-residue loop previously hypothesized to differentiate fluorinases from chlorinases (**Fig. 2c-e**). Notably, only four of all the retrieved sequences were not sourced from Actinobacteria. These included the putative enzymes from a *Chloroflexi* bacterium (*Chloroflexi*), *Peptococcaceae* bacterium CEB3 (Clostridia), *Thermosulfurhabdus norvegica* (Deltaproteobacteria) and *Methanosaeta* sp. PtaU1.Bin055 (Methanomicrobia). Phylogenetic analysis of the 16S rRNA sequences of the fluorinase-encoding organisms gave a similar result to that obtained when using the fluorinase amino acid sequences, except that, as expected, *Salinispora tropica* groups together with the other Actinomycetes, in a clade separate from the one formed by *Streptomyces* sp. (**Table S2** and **Fig. S1**).

The genomic context of the different *flA* genes was likewise examined (**Table S3**). As reported for the fluorination gene clusters of *Streptomyces* sp. MA37, *N. brasiliensis*, *Actinoplanes* sp. N902-109, and *S. xinghaiensis*, all Actinomycetes presented gene clusters resembling that of *S. cattleya* (**Fig. 3**), the most studied source of *fl* genes to date (Huang *et al.*, 2006; O’Hagan and Deng, 2015). The genes *flB* (encoding a 5'-FDA phosphorylase), *flG* (encoding a response regulator), *flH* (encoding a putative cation:H<sup>+</sup> antiporter) and *flI* (encoding a *S*-adenosyl-L-homocysteinase) were conserved in all Actinomycetes. Most of them also presented the genes *flIso* (5'-fluoro-5'-deoxyadenosine-1-phosphate isomerase) and *flFT* (4-fluoro-L-threonine transaldolase), involved in the synthesis of fluoroacetate and 4-fluoro-L-threonine, respectively. In

1 these cases, genes encoding a prolyl-tRNA synthetase-associated protein and an EamA family transporter  
2 were usually found in proximity to *fIFT*. In *S. cattleya*, the products of these genes (termed *fthB* and *fthC*,  
3 respectively) play a role in detoxification by deacylation of 4-fluoro-L-threoninyl-tRNA and export of 4-fluoro-  
4 L-threonine (McMurry and Chang, 2017). Interestingly, *Amycolatopsis bartoniae* and *Goodfellowiella* sp.  
5 AN110305 lacked either *flIso* and *fIFT* orthologues within their *fl* clusters, presenting, instead, orthologues to  
6 the *fdr* genes of *Streptomyces* sp. MA37 that are probably involved in the biosynthesis of 5-fluoro-2,3,4-  
7 trihydroxypentanoic acid *via* the fluorosugar intermediate 5-fluoro-5-deoxy-D-ribose (Ma *et al.*, 2015).  
8 Activities encoded in these clusters include phosphoesterases, short chain dehydrogenases, dihydroxyacid  
9 dehydratases and cyclases, suggesting that the main fluorinated compounds produced by these organ-isms  
10 could be different from the canonical fluoroacetate and 4-fluoro-L-threonine. Similar activities seem to be also  
11 encoded by genes in the vicinity of *flA* in *Chloroflexi* bacterium and *sall* in *S. tropica* (Eustáquio *et al.*, 2009).  
12 Other genes widely distributed amongst the different actinomycotal clusters encoded activities related to SAM  
13 synthesis (i.e. SAM synthetase) and S-adenosyl-L-homocysteine degradation (i.e. S-adenosyl-L-  
14 homocysteinase), a competitive inhibitor of fluorinase activity (Schaffrath *et al.*, 2003). As indicated above,  
15 the latter gene (*flI*) was present in all actinomycotal clusters. Since SAM and S-adenosyl-L-homocysteine are  
16 involved in essential cellular reactions, it is likely that these enzymes modulate the levels of these compounds  
17 during secondary metabolism, when organofluorines are produced. Further analysis of the genes found in  
18 these *fl* clusters will provide clues as to what activities are needed to establish robust and efficient  
19 biofluorination pathways in heterologous hosts.

20  
21 Next, coding sequences of all FIA candidates were codon-optimized for production in *Escherichia coli* as N-  
22 terminal His-tag fusions (**Tables S4** and **S5**)—*flA<sup>MA37</sup>*, *flA<sup>Scat</sup>* and *flA<sup>Sxin</sup>* had been previously codon-optimized  
23 for expression in Gram-negative hosts (Calero *et al.*, 2020). *Sall<sup>Stro</sup>* was not included in this experimental set  
24 since it is reportedly inactive on F<sup>-</sup> (Eustáquio *et al.*, 2008). The expression of the 16 candidate genes was  
25 initially evaluated in 96-well microtiter plate cultures. *FIA<sup>Tnor</sup>*, *FIA<sup>Amza</sup>* and *FIA<sup>Pbac</sup>* could not be obtained as  
26 soluble enzymes and were not included in further analyses. Moreover, very faint bands of the expected size  
27 were observed in SDS-PAGE of *E. coli* extracts producing *FIA<sup>Tnor</sup>* and *FIA<sup>Amza</sup>*, suggesting limited expression  
28 levels (**Fig. S2**). Therefore, we proceeded to obtain the remaining 13 candidates in medium-scale shaken-  
29 flask cultures for His-tag purification and activity assays. The purified enzymes were incubated in the

1 presence of increasing SAM concentrations for 1 h, after which the 5'-FDA produced was measured by HPLC.  
2 5'-FDA synthase activity could be detected for 12 out of the 13 candidates (**Fig. S3**). The protein  
3 concentration was normalized for these assays, although the enzymes were recovered with varying degrees  
4 of purity due to differences in solubility—typical of proteins isolated from high-G+C-content species when  
5 produced in a Gram-negative host. Notably, the enzyme from *Methanosaeta* sp. (FIA<sup>PtaU1</sup>, predicted to be a  
6 chlorinase), was one of the top performers, together with FIA<sup>SAJ15</sup>. These enzymes had specific activities  
7 similar to those of FIA<sup>MA37</sup> and FIA<sup>Sxin</sup>, which present the highest catalytic efficiencies on SAM fluorination  
8 reported to date.

9  
10 FIA<sup>PtaU1</sup> and FIA<sup>SAJ15</sup> were selected for large-scale shaken-flask production and a more detailed biochemical  
11 characterization. Steady-state kinetics assays with 1  $\mu$ M of the purified protein, varying concentrations of  
12 SAM (1.5 to 800  $\mu$ M) and 75 mM KF revealed that both of these enzymes presented higher turnover rates  
13 ( $k_{cat}$ ) than FIA<sup>MA37</sup> and FIA<sup>Sxin</sup> (**Fig. 4a** and **Table 2**). Surprisingly,  $K_M^{SAM}$  values were  $< 10 \mu$ M, much lower  
14 than what had been previously reported in the literature for fluorinases (Schaffrath *et al.*, 2003; Zhu *et al.*,  
15 2007; Sooklal *et al.*, 2020). Previous studies used high enzyme concentrations ( $>10 \mu$ M), which impedes  
16 reaching a steady state of the reaction for substrate concentrations below 10  $\mu$ M. Additionally, we have used  
17 a KF concentration that ensures F<sup>-</sup> saturation without causing any inhibitory effect (previous studies have  
18 used KF concentrations  $> 200$  mM).

19  
20 To gain insight on the structural factors that could determine these differences in activity, we inspected the  
21 predicted crystal structures of FIA<sup>MA37</sup>, FIA<sup>Sxin</sup>, FIA<sup>SAJ15</sup>, FIA<sup>PtaU1</sup> and SalL<sup>Stro</sup>. Examination of the residues  
22 potentially interacting with SAM (distances  $< 5 \text{ \AA}$ ) revealed important variations between the substrate binding  
23 pocket of FIA<sup>PtaU1</sup> and that of the other fluorinases (**Fig. 4c-f**). These differences were mostly located near  
24 the adenylyl moiety of SAM, and involve the substitution of a conserved proline for an arginine residue and an  
25 RNAA motif for YYGG. This motif is found in the C-terminal domain of fluorinases, which is more variable  
26 than the N-terminal domain (**Fig. S4**) and is presumably also involved in hexamer formation (Kittilä *et al.*,  
27 2022). Interestingly, the variations found in FIA<sup>PtaU1</sup> do not resemble those seen in the SalL<sup>Stro</sup> chlorinase.  
28 The evaluation of the effect of these amino acid differences in fluorinase activity will be of interest for future  
29 enzyme engineering efforts.

1 Since FIA<sup>PtaU1</sup> was predicted to be a chlorinase, we evaluated whether it was also active towards S<sub>N</sub>2-  
2 dependent addition of Cl<sup>-</sup> onto SAM. Unexpectedly, no 5'-CIDA accumulation could be detected in enzymatic  
3 reactions in which KF was replaced by KCl—in contrast to Sall<sup>Stro</sup> (Eustáquio *et al.*, 2008). Previous studies  
4 have shown that FIA<sup>Scat</sup> can also catalyze the chlorination reaction (Deng *et al.*, 2006). However, this feature  
5 requires the simultaneous removal of L-Met or 5'-CIDA, the reaction products, since the reverse  
6 dehalogenation reaction is favored. We could observe transhalogenation on 5'-CIDA (i.e. 5'-FDA production  
7 in the presence of L-Met and F<sup>-</sup>, steps III and I in **Fig. 1**, respectively; see **Fig. 3b**). Again, FIA<sup>PtaU1</sup> catalytically  
8 outperformed all other fluorinases, with a 3-fold higher V<sub>max</sub> value. Although we cannot rule out that FIA<sup>PtaU1</sup>  
9 could execute *de novo* chlorination, it is clear that the 23-residue loop reportedly found in «conventional»  
10 fluorinases is not essential for the activity towards F<sup>-</sup>.

11  
12 On this background, we tested the biosynthesis of fluorometabolites both *in vitro* and *in vivo* by engineering  
13 selected fluorinases in *Pseudomonas putida*. We have previously designed a fluoride-responsive genetic  
14 circuit that enabled biofluorination in this heterologous host (Calero *et al.*, 2020). Here, this system was  
15 adapted to express either *fIA<sup>PtaU1</sup>* or *fIASAJ15*, codon-optimized to facilitate expression in *P. putida*. Upon  
16 induction of the system with NaF and expression of the fluorinase genes for 20 h at 30°C, production of 5'-  
17 FDA was determined by LC-MS to evaluate *de novo* fluorination activity *in vivo* (**Fig. 4**). Production of 5'-FDA  
18 could be detected for cells expressing either *fIA<sup>PtaU1</sup>*, *fIASAJ15*, *fIAMA37* and *fIASxin*. Notably, intracellular 5'-FDA,  
19 indicative of *in vivo* biofluorination, was 6- to 12-fold higher in cells expressing *fIA<sup>PtaU1</sup>* with respect to the  
20 other three fluorinase genes. On the other hand, fluorinase activity from cell-free extracts incubated for 20 h  
21 at 30°C in the presence of exogenously-added 200 μM SAM and 5 mM NaF was similar in all cases (data  
22 not shown).

23

## 24 CONCLUSION

25

26 In conclusion, out of the 10 newly identified enzymes, the non-conventional FIA from the archaea  
27 *Methanosaeta* sp. PtaU1.Bin055 was found to present turnover rates far superior than those of all FIAs  
28 reported to date. Surprisingly, this enzyme lacks the loop that was hypothesized to be a differentiating feature  
29 between fluorinases and chlorinases, challenging the prevailing view that this loop is required for activity



1 towards F<sup>-</sup>. This work highlights the importance of systematic and efficient biocatalyst selection across ever-  
2 expanding genomic databases followed by careful characterization *in vitro* and cell factory engineering *in*  
3 *vivo*. These results open avenues for the implementation of neo-metabolic pathways incorporating F in the  
4 host cell by synthetic biology approaches (Cros *et al.*, 2022).

## 6 ABBREVIATIONS

7  
8 5'-CIDA, 5'-chloro-5'-deoxyadenosine; 5'-FDA, 5'-fluoro-5'-deoxyadenosine; FIA, fluorinase; L-Met, L-  
9 methionine; SAM, S-adenosyl-L-methionine; Sall, chlorinase.

## 11 REFERENCES

- 12  
13 Calero, P., Volke, D.C., Lowe, P.T., Gottfredsen, C.H., O'Hagan, D., and Nickel, P.I. (2020) A fluoride-  
14 responsive genetic circuit enables *in vivo* biofluorination in engineered *Pseudomonas putida*. *Nat.*  
15 *Commun.* **11**: 5045.
- 16 Carvalho, M.F., and Oliveira, R.S. (2017) Natural production of fluorinated compounds and biotechnological  
17 prospects of the fluorinase enzyme. *Crit. Rev. Biotechnol.* **37**: 880-897.
- 18 Cros, A., Alfaro-Espinoza, G., de Maria, A., Wirth, N.T., and Nickel, P.I. (2022) Synthetic metabolism for  
19 biohalogenation. *Curr. Opin. Biotechnol.* **74**: 180-193.
- 20 Deng, H., Cobb, S.L., McEwan, A.R., McGlinchey, R.P., Naismith, J.H., O'Hagan, D., *et al.* (2006) The  
21 fluorinase from *Streptomyces cattleya* is also a chlorinase. *Angew. Chem. Int. Ed. Engl.* **45**: 759-762.
- 22 Deng, H., Ma, L., Bandaranayaka, N., Qin, Z., Mann, G., Kyeremeh, K., *et al.* (2014) Identification of  
23 fluorinases from *Streptomyces* sp MA37, *Nocardia brasiliensis*, and *Actinoplanes* sp N902-109 by  
24 genome mining. *ChemBioChem* **15**: 364-368.
- 25 Dong, C., Huang, F., Deng, H., Schaffrath, C., Spencer, J.B., O'Hagan, D., and Naismith, J.H. (2004) Crystal  
26 structure and mechanism of a bacterial fluorinating enzyme. *Nature* **427**: 561-565.
- 27 Eustáquio, A.S., Pojer, F., Noel, J.P., and Moore, B.S. (2008) Discovery and characterization of a marine  
28 bacterial SAM-dependent chlorinase. *Nat. Chem. Biol.* **4**: 69-74.

- 1 Eustáquio, A.S., McGlinchey, R.P., Liu, Y., Hazzard, C., Beer, L.L., Florova, G., *et al.* (2009) Biosynthesis of  
2 the salinosporamide A polyketide synthase substrate chloroethylmalonyl-coenzyme A from S-  
3 adenosyl-L-methionine. *Proc. Natl. Acad. Sci. USA* **106**: 12295-12300.
- 4 Harsanyi, A., and Sandford, G. (2015) Organofluorine chemistry: applications, sources and sustainability.  
5 *Green Chem.* **17**: 2081-2086.
- 6 Hon, J., Borko, S., Stourac, J., Prokop, Z., Zendulka, J., Bednar, D., *et al.* (2020) *EnzymeMiner*: Automated  
7 mining of soluble enzymes with diverse structures, catalytic properties and stabilities. *Nucleic Acids*  
8 *Res.* **48**: W104-W109.
- 9 Huang, F., Haydock, S.F., Spitteller, D., Mironenko, T., Li, T.L., O'Hagan, D., *et al.* (2006) The gene cluster  
10 for fluorometabolite biosynthesis in *Streptomyces cattleya*: a thioesterase confers resistance to  
11 fluoroacetyl-coenzyme A. *Chem. Biol.* **13**: 475-484.
- 12 Inoue, M., Sumii, Y., and Shibata, N. (2020) Contribution of organofluorine compounds to pharmaceuticals.  
13 *ACS Omega* **5**: 10633-10640.
- 14 Kittilä, T., Calero, P., Fredslund, F., Lowe, P.T., Tezé, D., Nieto-Domínguez, M., *et al.* (2022) Oligomerization  
15 engineering of the fluorinase enzyme leads to an active trimer that supports synthesis of  
16 fluorometabolites in vitro. *Microb. Biotechnol. In press*, DOI: 10.1111/1751-7915.14009.
- 17 Ma, L., Bartholomé, A., Tong, M.H., Qin, Z., Yu, Y., Shepherd, T., *et al.* (2015) Identification of a  
18 fluorometabolite from *Streptomyces* sp. MA37: (2R3S4S)-5-fluoro-2,3,4-trihydroxypentanoic acid.  
19 *Chem. Sci.* **6**: 1414.
- 20 Ma, L., Li, Y., Meng, L., Deng, H., Li, Y., and Diao, A. (2016) Biological fluorination from the sea: discovery  
21 of a SAM-dependent nucleophilic fluorinating enzyme from the marine-derived bacterium  
22 *Streptomyces xinghaiensis* NRRL B24674. *RSC Adv.* **6**: 27047-27051.
- 23 Markakis, K., Lowe, P.T., Davison-Gates, L., O'Hagan, D., Rosser, S.J., and Elfick, A. (2020) An engineered  
24 *E. coli* strain for direct *in vivo* fluorination. *ChemBioChem* **21**: 1856-1860.
- 25 Martinelli, L., and Nikel, P.I. (2019) Breaking the state-of-the-art in the chemical industry with new-to-Nature  
26 products via synthetic microbiology. *Microb. Biotechnol.* **12**: 187-190.
- 27 McMurry, J.L., and Chang, M.C.Y. (2017) Fluorothreonyl-tRNA deacylase prevents mistranslation in the  
28 organofluorine producer *Streptomyces cattleya*. *Proc. Natl. Acad. Sci. USA* **114**: 11920-11925.

- 1 Nieto-Domínguez, M., and Nikel, P.I. (2020) Intersecting xenobiology and *neo*-metabolism to bring novel  
2 chemistries to life. *ChemBioChem* **21**: 2551-2571.
- 3 O'Hagan, D., Schaffrath, C., Cobb, S.L., Hamilton, J.T., and Murphy, C.D. (2002) Biochemistry: biosynthesis  
4 of an organofluorine molecule. *Nature* **416**: 279.
- 5 O'Hagan, D. (2008) Understanding organofluorine chemistry. An introduction to the C–F bond. *Chem. Soc.*  
6 *Rev.* **37**: 308-319.
- 7 O'Hagan, D., and Deng, H. (2015) Enzymatic fluorination and biotechnological developments of the  
8 fluorinase. *Chem. Rev.* **115**: 634-649.
- 9 Ogawa, Y., Tokunaga, E., Kobayashi, O., Hirai, K., and Shibata, N. (2020) Current contributions of  
10 organofluorine compounds to the agrochemical industry. *iScience* **23**: 101467.
- 11 Schaffrath, C., Deng, H., and O'Hagan, D. (2003) Isolation and characterisation of 5'-fluorodeoxyadenosine  
12 synthase, a fluorination enzyme from *Streptomyces cattleya*. *FEBS Lett.* **547**: 111-114.
- 13 Sooklal, S.A., de Koning, C., Brady, D., and Rumbold, K. (2020) Identification and characterisation of a  
14 fluorinase from *Actinopolyspora mzabensis*. *Protein Expr. Purif.* **166**: 105508.
- 15 Sun, H., Yeo, W.L., Lim, Y.H., Chew, X., Smith, D.J., Xue, B., *et al.* (2016) Directed evolution of a fluorinase  
16 for improved fluorination efficiency with a non-native substrate. *Angew. Chem. Int. Ed.* **55**: 14277-  
17 14280.
- 18 Thomsen, M., Vogensen, S.B., Buchardt, J., Burkart, M.D., and Clausen, R.P. (2013) Chemoenzymatic  
19 synthesis and in situ application of S-adenosyl-L-methionine analogs. *Org. Biomol. Chem.* **11**: 7606-  
20 7610.
- 21 Vanacek, P., Sebestova, E., Babkova, P., Bidmanova, S., Daniel, L., Dvořák, P., *et al.* (2018) Exploration of  
22 enzyme diversity by integrating bioinformatics with expression analysis and biochemical  
23 characterization. *ACS Catal.* **8**: 2402-2412.
- 24 Zhu, X., Robinson, D.A., McEwan, A.R., O'Hagan, D., and Naismith, J.H. (2007) Mechanism of enzymatic  
25 fluorination in *Streptomyces cattleya*. *J. Am. Chem. Soc.* **129**: 14597-14604.
- 26

TABLES

**Table 1.** Putative fluorinases retrieved from EnzymeMiner search using FIA<sup>MA37</sup> as query.

| Name                 | Organism                                 | ID (%) <sup>a</sup> |
|----------------------|------------------------------------------|---------------------|
| FIA <sup>MA37</sup>  | <i>Streptomyces</i> sp. MA37             | Query               |
| FIA <sup>Scat</sup>  | <i>Streptomyces cattleya</i>             | 87.6%               |
| FIA <sup>Sxin</sup>  | <i>Streptomyces xinghaiensis</i>         | 86.0%               |
| FIA <sup>SAJ15</sup> | <i>Streptomyces</i> sp. SAJ15            | 85.0%               |
| FIA <sup>N902</sup>  | <i>Actinoplanes</i> sp. N902-109         | 80.7%               |
| FIA <sup>Amza</sup>  | <i>Actinopolyspora mzabensis</i>         | 78.9%               |
| FIA <sup>Abar</sup>  | <i>Amycolatopsis bartoniae</i>           | 79.1%               |
| FIA <sup>CA12</sup>  | <i>Amycolatopsis</i> sp. CA-128772       | 78.6%               |
| FIA <sup>AN11</sup>  | <i>Goodfellowiella</i> sp. AN110305      | 77.7%               |
| FIA <sup>Nbra2</sup> | <i>Nocardia brasiliensis</i> IFM 10847   | 75.7%               |
| FIA <sup>Nbra3</sup> | <i>Nocardia brasiliensis</i> NCTC 11294  | 75.3%               |
| FIA <sup>Nbra1</sup> | <i>Nocardia brasiliensis</i> ATCC 700358 | 75.3%               |
| FIA <sup>Cbac</sup>  | <i>Chloroflexi</i> bacterium             | 69.3%               |
| FIA <sup>Pbac</sup>  | <i>Peptococcaceae</i> bacterium CEB3     | 64.8%               |
| FIA <sup>Tnor</sup>  | <i>Thermodesulforhabdus norvegica</i>    | 54.5%               |
| FIA <sup>PtaU1</sup> | <i>Methanosaeta</i> sp. PtaU1.Bin055     | 49.5%               |
| SaIL <sup>Stro</sup> | <i>Salinispora tropica</i> CNB-440       | 35.6%               |

<sup>a</sup> Sequence identity. References to known FIAs are indicated.

1 **Table 2.** Michaelis-Menten kinetic constants of selected fluorinases.<sup>a</sup>

2

| <b>Fluorinase</b>    | <b><math>K_M^{\text{SAM}}</math></b><br>( $\mu\text{M}$ ) | <b><math>k_{\text{cat}}</math></b><br>( $\text{min}^{-1}$ ) | <b><math>k_{\text{cat}}/K_M^{\text{SAM}}</math></b><br>( $\text{mM}^{-1} \text{min}^{-1}$ ) |
|----------------------|-----------------------------------------------------------|-------------------------------------------------------------|---------------------------------------------------------------------------------------------|
| FIA <sup>MA37</sup>  | 4.42 ± 0.58                                               | 0.16 ± 0.01                                                 | 36.36 ± 4.82                                                                                |
| FIA <sup>Sxin</sup>  | 3.76 ± 0.15                                               | 0.22 ± 0.01                                                 | 58.63 ± 2.63                                                                                |
| FIA <sup>SAJ15</sup> | 9.62 ± 1.43                                               | 0.34 ± 0.01                                                 | 35.81 ± 5.43                                                                                |
| FIA <sup>PtaU1</sup> | 6.99 ± 1.06                                               | 0.41 ± 0.01                                                 | 57.54 ± 8.85                                                                                |

3

4 <sup>a</sup> Assays conducted in 50 mM HEPES, pH 7.8, with 75 mM KF and varying SAM concentrations at 37°C.

5 Average and standard deviation are given for triplicate independent measurements.

## FIGURES

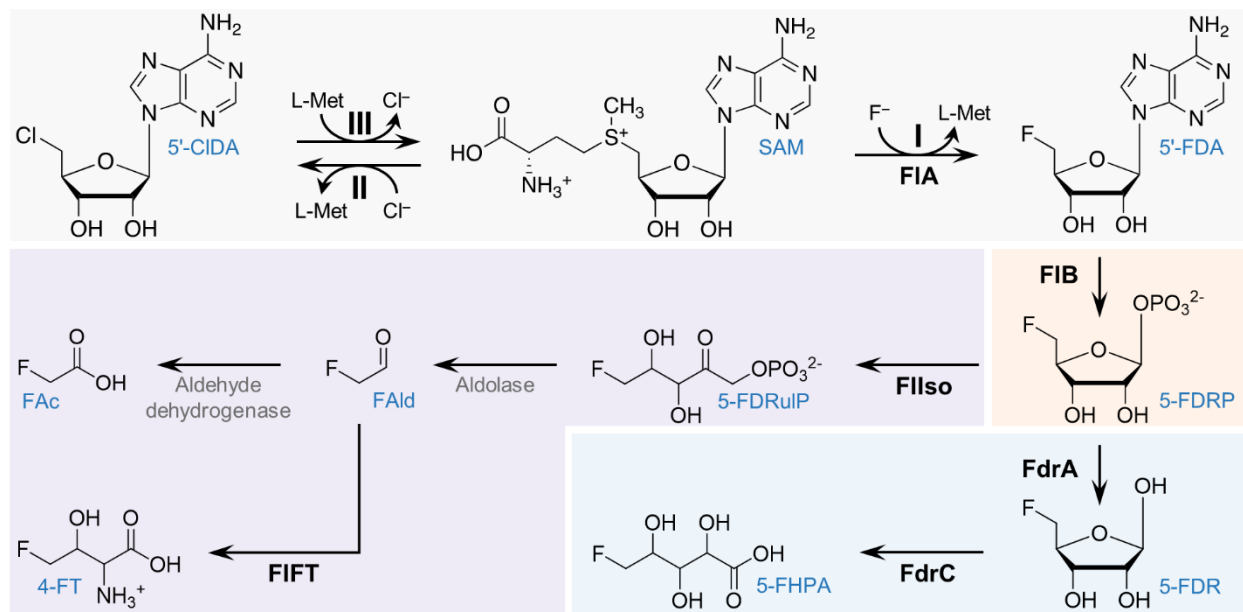

**Fig. 1** · In gray, reactions catalyzed by the fluorinase/chlorinase enzyme: (I) forward fluorination reaction; (II) forward chlorination reaction; and (III) reverse chlorination reaction. In orange, common step in fluorometabolite biosynthetic pathways. In purple, canonical fluoroacetate and 4-fluoro-L-threonine biosynthetic pathway. In blue, 5'-fluoro-5'-deoxy-D-ribose biosynthetic pathway. Compound abbreviations (blue font): 5'-CIDA, 5'-chloro-5'-deoxyadenosine; SAM, S-adenosyl-L-methionine; 5'-FDA, 5'-fluoro-5'-deoxyadenosine; 5-FDRP, 5-fluoro-5'-deoxy-D-ribose-1-phosphate; 5-FDRuIP, 5-fluoro-5'-deoxy-D-ribulose-1-phosphate; FAld, fluoroacetaldehyde; FAc, fluoroacetate; 4-FT, 4-fluoro-L-threonine; 5-FDR, 5-fluoro-5'-deoxy-D-ribose; 5-FHPA, 5-fluoro-2,3,4-trihydroxypentanoic acid. Enzyme abbreviations (in bold): FIA, fluorinase; FIB, 5'-fluoro-5'-deoxyadenosine phosphorylase; FIIso, 5-fluoro-5'-deoxy-D-ribose-1-phosphate isomerase; FIFT, 4-fluoro-L-threonine transaldolase; FdrA, 5-fluoro-5'-deoxy-D-ribose-1-phosphate phosphoesterase; FdrC, 5-fluoro-5'-deoxy-D-ribose dehydrogenase.

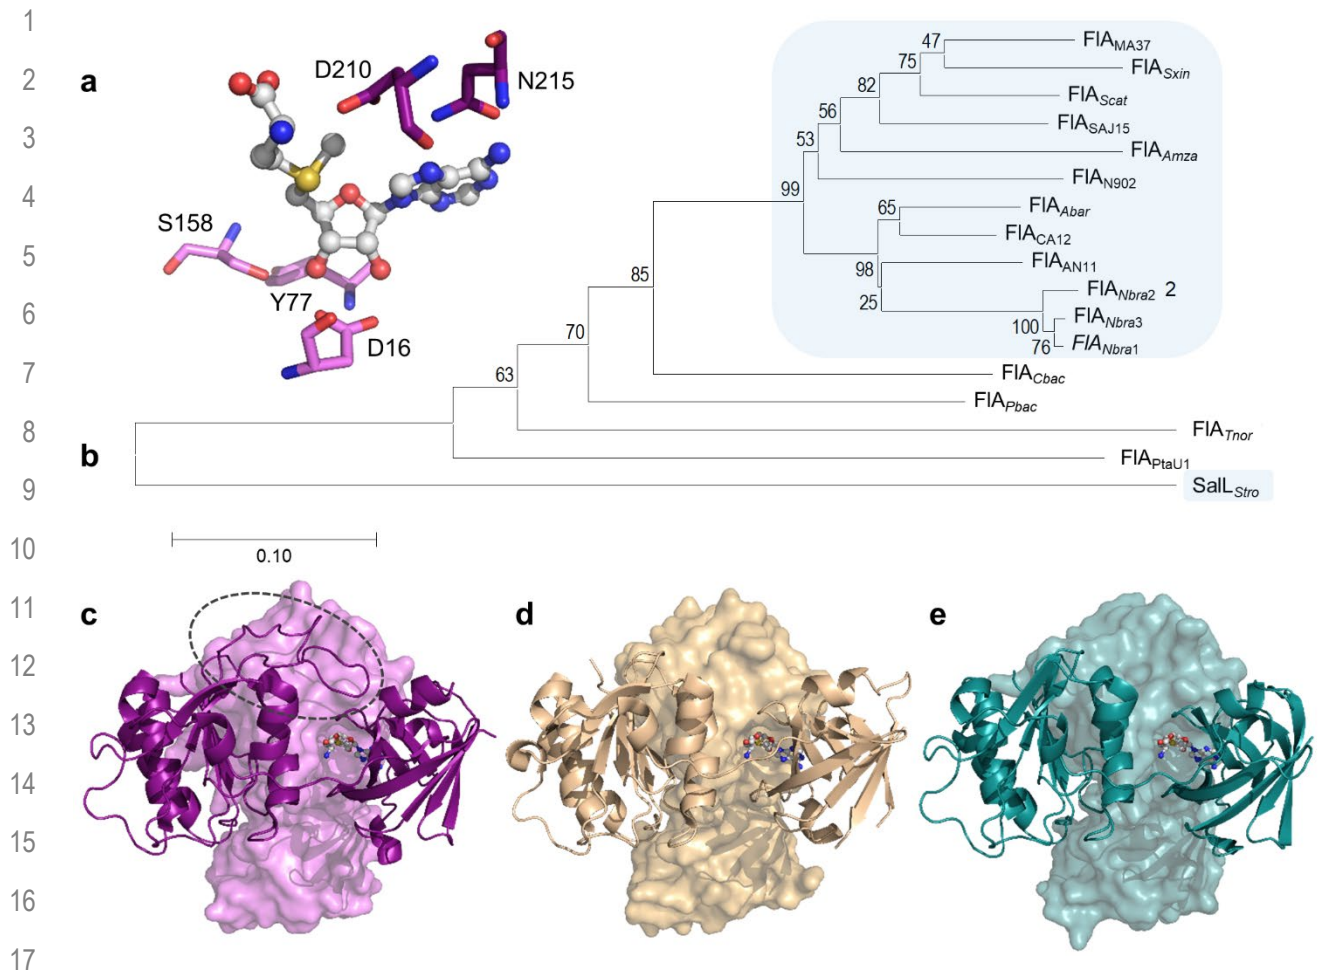

**Fig. 2** · Putative fluorinases identified by genome mining. (a) Residues specified as essential for the EnzymeMiner search, based on the crystal structure of FIA<sup>MA37</sup> (PDB ID 5B6I). The SAM substrate is shown in ball-and-stick representation. (b) Phylogenetic tree of retrieved fluorinase sequences obtained using MEGA-X software, inferred using the Neighbor-Joining method with a bootstrap of 10,000 iterations. The percentage of replicate trees in which the associated taxa clustered together in the bootstrap test are shown next to the branches. The tree is drawn to scale, with branch lengths in the same units as those of the evolutionary distances used to infer the phylogenetic tree. Sequences sourced from Actinomycetes are highlighted as blue squares. (c-e) 3D structures for FIA<sup>MA37</sup> (c), SalL<sup>Stro</sup> (d, PDB ID 6RYZ), and FIA<sup>PtaU1</sup> (e, modelled from the FIA<sup>Scat</sup> crystal structure PDB ID 2V7V). The loop hypothesized to differentiate fluorinases from chlorinases is circled in a dashed gray line. Two chains from the homo-trimer for each structure are shown as cartoon and surface representations, respectively.

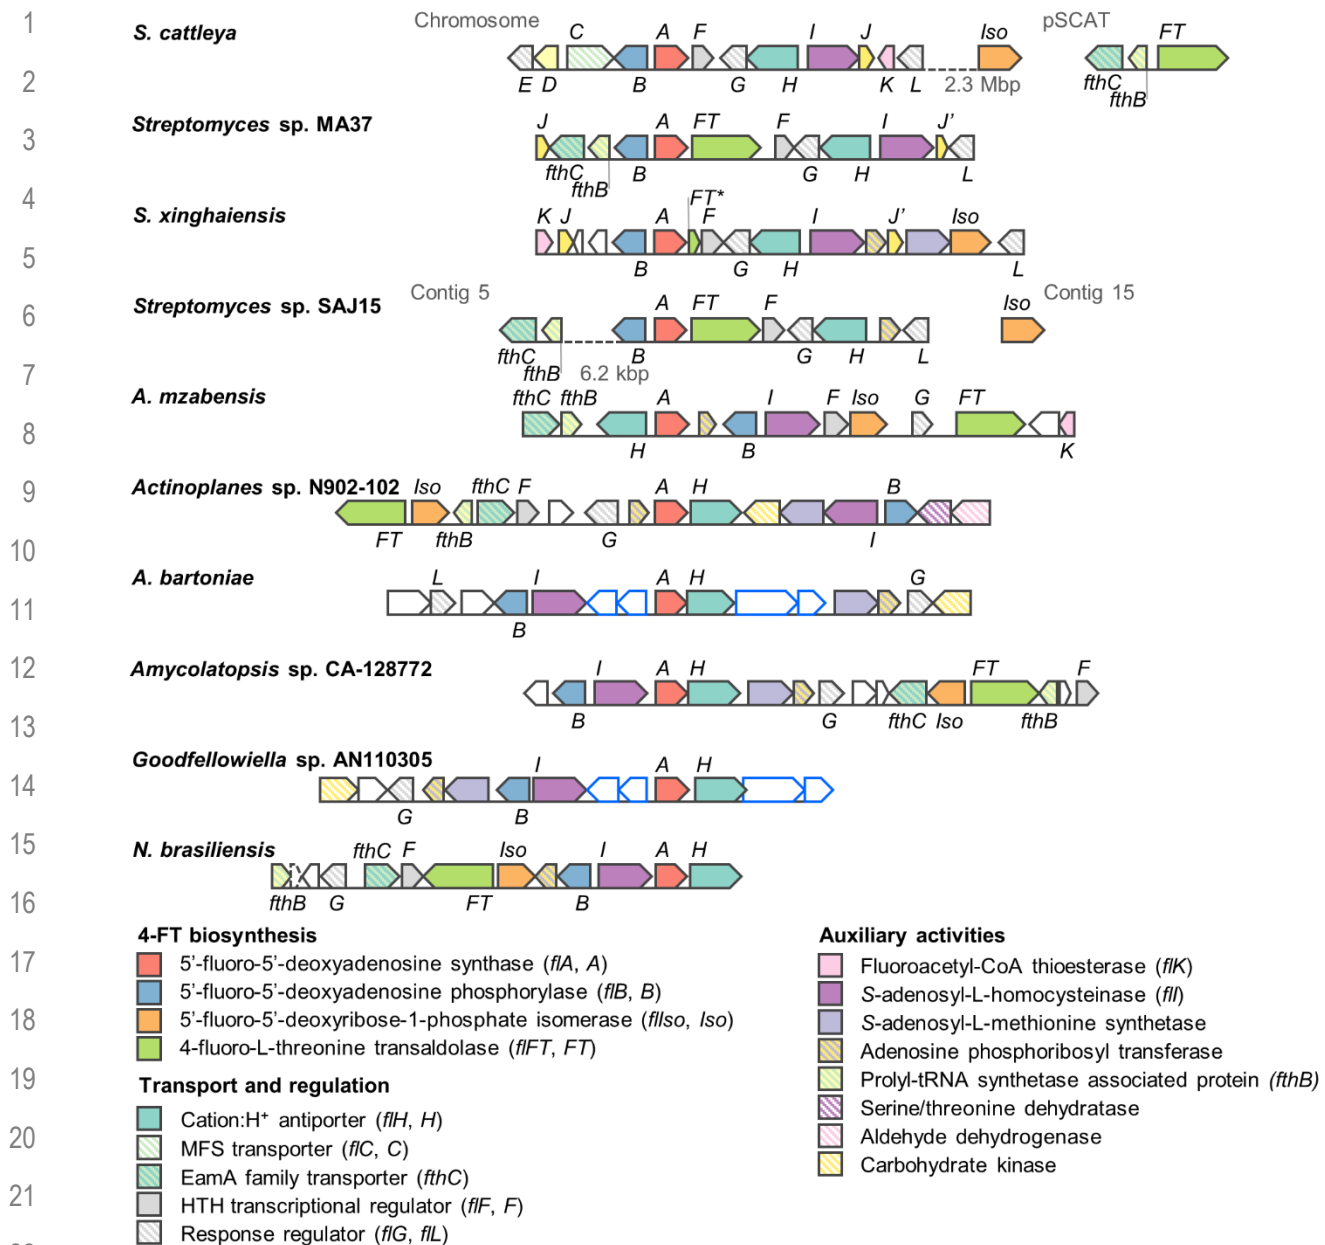

23 **Fig. 3** · Fluorination gene clusters from Actinomycetes. For clarity, the clusters are drawn centered on *flA* (A)  
 24 in the sense orientation. Numbers under dashed lines indicate the distance between open reading frames  
 25 (ORFs) found in the same sequence entry; ORFs in separate entries are not connected by a line. Italicized  
 26 letters indicate orthologues to the corresponding *fl* genes from *S. cattleya*. *J'* indicates duplicate *flJ* copies  
 27 (encoding DUF190 domain-containing protein). *FT\** is a truncated pseudogene homologous to *flFT*.  
 28 Orthologues to *fdr* genes from *Streptomyces* sp. MA37 are indicated as white blocks with blue outlines. ORFs



- 1 outlined in black represent genes with other/unknown functions. MFS, major facilitator superfamily; HTH,
- 2 helix-turn-helix.

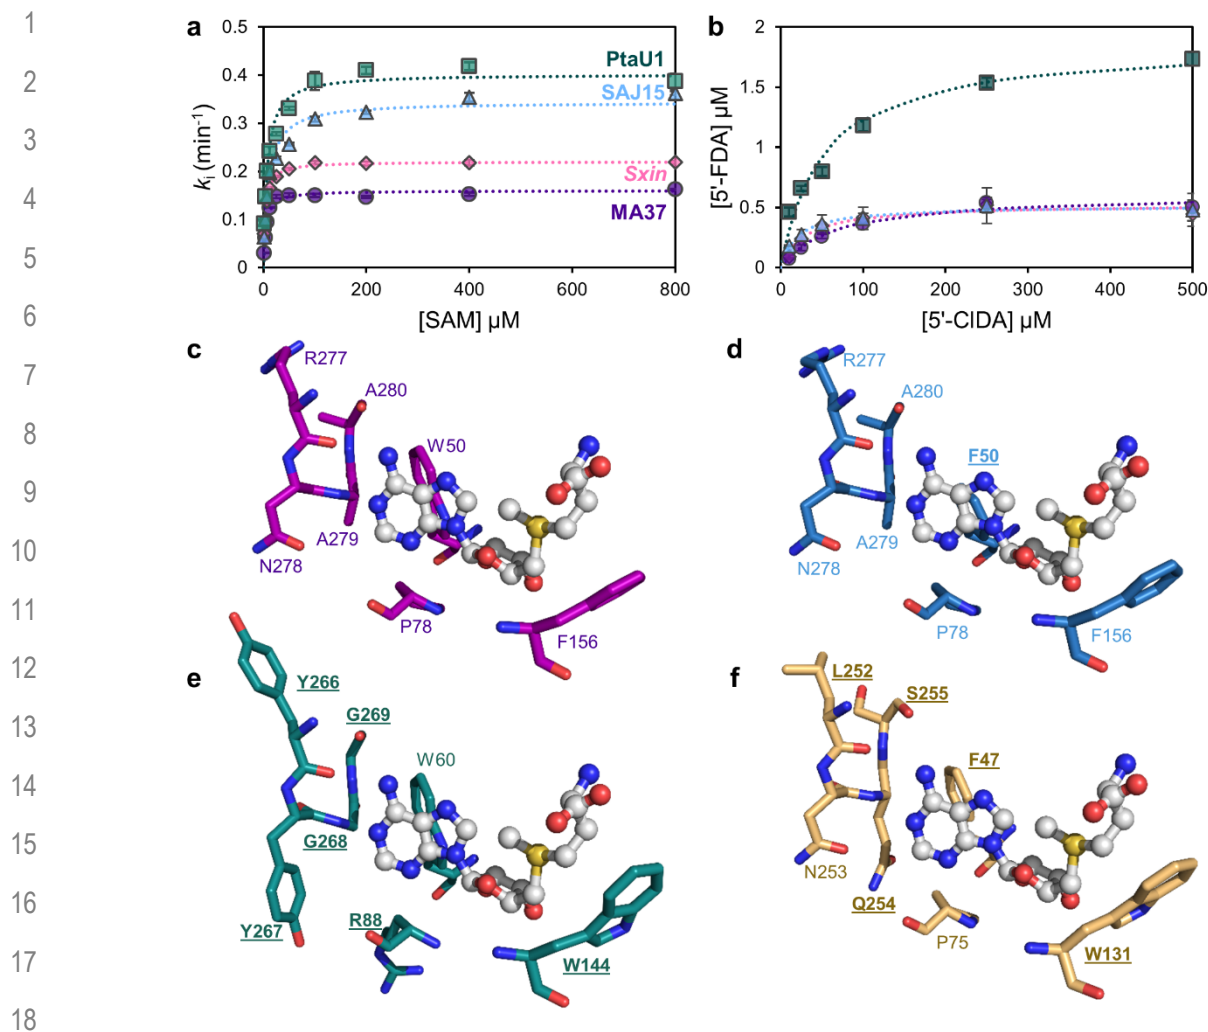

**Fig. 4** · Biochemical characterization and residue conservation of selected fluorinases. (a) Steady-state fluorination assays using increasing SAM concentrations. Reactions were carried out at 37°C in 50 mM HEPES buffer, pH 7.8, with 75 mM KF. Dotted lines show fits to the Michaelis-Menten equation ( $R^2 > 0.95$  in all cases). (b) End-point (1 h) transhalogenation assays with increasing 5'-CIDA concentrations. Reactions were carried out at 37°C in 50 mM HEPES buffer, pH = 7.8, with 75 mM KF and 1 mM L-Met. Error bars represent standard deviations from triplicate independent assays. Symbols and color codes are kept in both panels. (c-f) Variable residues in the substrate binding pocket of FIA<sup>MA37</sup> (c), FIA<sup>SAJ15</sup> (d), FIA<sup>PtaU1</sup> (e) and SalL<sup>Stro</sup>. Residues that differ from those of FIA<sup>MA37</sup> are labelled in underlined bold font. FIA<sup>Sxin</sup> residues are identical to those of FIA<sup>MA37</sup>. The SAM substrate is shown in ball-and-stick representation.

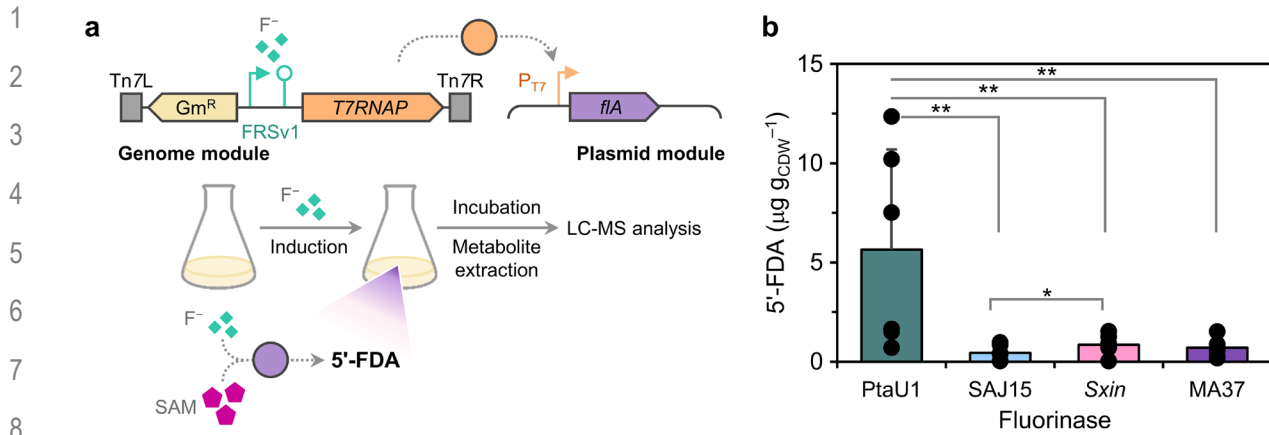

9 **Fig. 5** · Implementing *in vivo* biofluorination in engineered *P. putida* KT2440. **(a)** Schematic representation of  
10 the fluoride-responsive genetic circuit based on the T7 phage RNA polymerase (T7RNAP) described by  
11 Calero *et al.* (2020) and workflow for the *in vivo* biofluorination assays in *P. putida*. The fluoride-responsive  
12 genetic circuit was induced by the addition of 15 mM NaF to the cultures at an OD<sub>600</sub> = 0.4–0.6. After  
13 incubating the cultures at 30°C for 20 h, an aliquot was taken for metabolite extraction, biomass quantification  
14 and LC-MS analysis of fluorometabolites. Further details are provided in the Supporting  
15 Information. **(b)** Intracellular 5'-FDA content in engineered *P. putida* expressing different fluorinase genes.  
16 The fluorometabolite concentration was normalized by the cell dry weight (CDW). Black dots show individual  
17 values of independent experiments and error bars represent standard deviations. Asterisks indicate  
18 significant differences with *p*-values < 0.1 (\*) or < 0.05 (\*\*) for a two-sample, one-sided Welch's *t*-test.
